# Supplementary material for: Characteristics and Health Risks of Phthalate Ester Contamination in Soil and Plants in Coastal Areas of South China
Source: MDPI journal article supplement (doi:10.3390/ijerph19159516), 2022-08-03
Supplement: s1 [file s1]

## Supplementary Material

### Characteristics and health risks of phthalate esters contamination in soil and plants in coastal areas of South China

Huanhuan Xing<sup>a,b</sup>, Xiaolong Yu<sup>b</sup>, Jiahui Huang<sup>b</sup>, Xiaodong Du<sup>a</sup>, Mengting Wang<sup>a</sup>,  
Jianteng Sun<sup>a,b,\*</sup>, Guining Lu<sup>a,\*</sup>, Xueqin Tao<sup>c</sup>

<sup>a</sup> *Key Laboratory of Ministry of Education on Pollution Control and Ecosystem Restoration in Industry Clusters, Guangdong Provincial Engineering and Technology Research Center for Environmental Risk Prevention and Emergency Disposal, School of Environment and Energy, South China University of Technology, Guangzhou 510006, Guangdong, China*

<sup>b</sup> *Guangdong Provincial Key Laboratory of Petrochemical Pollution Processes and Control, School of Environmental Science and Engineering, Guangdong University of Petrochemical Technology, Maoming, Guangdong 525000, China*

<sup>c</sup> *College of Resources and Environment, Zhongkai University of Agriculture and Engineering, Guangzhou 510225, Guangdong, China*

*\*Corresponding author.*

*E-mail address:*

*sunjianteng@zju.edu.cn (J. Sun)*

*GNLu@foxmail.com (G. Lu)*

## Contents

**Text S1.** The plant extraction procedures.

**Text S2.** TOC and pH detection methods.

**Text S3.** The parameters used for calculating the noncarcinogenic and carcinogenic risks.

**Table S1.** Details of the 37 sampling sites.

**Table S2.** Parameters for adults and children in the exposure risk assessment.

**Table S3.** Parameters associated with different pollutants in the exposure risk assessment.

**Table S4.** Control and treatment standards of PAEs in soil recommended by the Environmental Protection Agency in United States (mg/kg).

**Table S5.** Soil TOC and pH concentrations in coastal South China.

**Table S6.** Risk assessment of exposure to adults from PAEs levels in soil-plant systems in coastal areas of South China.

**Table S7.** Risk assessment of exposure to children from PAEs levels in soil-plant systems in coastal areas of South China.

**Table S8.** Potential estrogenic effect of PAEs via plant.

**Figure S1.** Relative contributions of 15 PAEs in agricultural soil in coastal areas of South China.

**Figure S2.** Relative contributions of 15 PAEs in plants in coastal areas of South China.

**Text S1.** Weigh 0.5 g of plant sample accurately, adding 20 ml of hexane: dichloromethane (1:1 v/v) extractant mixture to the glass centrifuge tube containing the plant sample. Then ultrasonic extraction for 20 min, centrifuge for 10 min. Then transferring the supernatant from the tube to another completely dry and clean chicken heart flask. The ultrasonic extraction and centrifugation were repeated three times. Before passing through the silica gel column (neutral alumina, neutral silica gel, and anhydrous Na<sub>2</sub>SO<sub>4</sub> were filled into the glass column from bottom to top at 6 cm, 12 cm, and 2 cm), 5 ml of hexane and 15 ml of hexane: acetone (4:1; v/v) were measured and poured into the column to rinse the column. Then, the column was eluted with 45 mL acetone: hexane (1:4; v/v), and the eluate flowed into the cocktail vial. The resulting extracts were reduced nearly to dryness with a gentle nitrogen flow and diluted with hexane to 1.0 mL for instrumental analysis. And they were through the 0.22- $\mu$ m glass fiber filter membrane before instrumental analysis.

**Text S2.** Soil pH was measured by a pH meter with a soil/water ratio of 1:2.5. Total organic carbon (TOC) was measured with an Elementar Vavio EL III elemental analyzer (Hanau, Germany).

**Text S3.**  $C_{soil}$  is the concentration of the pollutant in the soil (mg/kg);  $C_{plant}$  is the concentration of the pollutant in the plant (mg/kg);  $IRS$  is the soil ingestion rate (mg/day);  $EF$  is the exposure frequency (days/yr);  $ED$  is the exposure duration (years);  $BW$  is the body weight (kg);  $AT$  is the average lifetime exposure (days);  $IhR$  is the inhalation rate (m<sup>3</sup>/day);  $PEF$  is the particulate emission factor (m<sup>3</sup>/kg);  $SA$  is the dermal surface area (cm<sup>2</sup>/day);  $AF$  is the soil adherence factor (mg/cm<sup>2</sup>);  $ABS$  is the fraction absorbed dermally from the soil (unitless);  $IRF$  is the daily intake rate of the agricultural products (mg/day) by residents ( $IRF$  for children is set to 1/3 of that for adults).  $CF$  is the conversion factor (10<sup>-6</sup> kg/mg). where  $RfDi$  (mg/kg/days) is the daily maximum permissible level of contaminants.  $ADD_i$  (mg/kg/days) is the average daily dosage, including dietary (plant intake,  $ADD_{intake}$ ) and non-dietary (soil ingestion, dermal contact and inhalation,  $ADD_{ingest}$ ,  $ADD_{dermal}$ ,  $ADD_{inhale}$ );  $CFS$  (mg/kg/days) is the carcinogenic slope factor.

**Table S1.** Details of the 37 sampling sites.

| Sampling location | East Longitude | Northern Latitude |
|-------------------|----------------|-------------------|
| CZX               | 117.100806     | 23.572944         |
| FCGS              | 108.515856     | 21.599694         |
| FCGL              | 108.212319     | 21.506575         |
| MMT               | 110.951478     | 21.563847         |
| MMN               | 111.049783     | 21.463131         |
| MMJ               | 111.262819     | 21.423122         |
| MML               | 111.419615     | 21.540649         |
| MMY               | 111.184644     | 21.500889         |
| QZD               | 118.979964     | 25.001342         |
| QZM               | 118.950714     | 25.158578         |
| QZB               | 118.760797     | 24.766167         |
| XMZ               | 118.020906     | 24.450444         |
| XML               | 118.193719     | 24.574706         |
| YJS               | 111.681011     | 21.595306         |
| YJL               | 111.822364     | 21.713825         |
| ZJT               | 110.409367     | 21.004358         |
| ZJB               | 110.375092     | 21.169489         |
| ZJJ               | 110.897219     | 21.402325         |
| ZZT               | 117.270911     | 23.635269         |
| ZZB               | 117.610719     | 23.795119         |
| ZZS               | 117.894083     | 24.079042         |
| ZZZ               | 118.097258     | 24.257917         |
| SWN               | 115.420097     | 22.694058         |
| BHX               | 109.712433     | 21.481092         |

|       |            |           |
|-------|------------|-----------|
| STB   | 116.780892 | 23.367864 |
| JYD   | 116.439492 | 22.949333 |
| GXQZZ | 108.734553 | 21.637219 |
| DGF   | 113.577308 | 22.88475  |
| JMC   | 113.010436 | 21.981544 |
| ZHG   | 113.237053 | 21.922653 |
| ZSL   | 113.550114 | 22.491089 |
| HZX   | 114.66896  | 22.77592  |
| GZX   | 113.566014 | 22.718153 |
| GZT   | 113.496656 | 22.942033 |
| GZN   | 113.504078 | 23.07355  |
| SZM   | 113.771397 | 22.741106 |
| SZX   | 114.327478 | 22.607647 |

---

**Table S2.** Parameters for adults and children in the exposure risk assessment.

| Parameter  | Population | Value               | Reference |
|------------|------------|---------------------|-----------|
| <i>IRS</i> | Adults     | 100                 | [1]       |
|            | Children   | 200                 |           |
| <i>EF</i>  | Adults     | 350                 | [1]       |
|            | Children   | 350                 |           |
| <i>ED</i>  | Adults     | 26                  | [1]       |
|            | Children   | 6                   |           |
| <i>BW</i>  | Adults     | 80                  | [1]       |
|            | Children   | 15                  |           |
| <i>AT</i>  | Adults     | 9490 non-cancer)    | [1]       |
|            |            | 25550 (cancer)      |           |
|            | Children   | 2190 (non-cancer)   |           |
|            |            | 25550 (cancer)      |           |
| <i>IhR</i> | Adults     | 13.25 <sup>a</sup>  | [2]       |
|            | Children   | 12 <sup>b</sup>     |           |
| <i>PEF</i> | Adults     | 1.4×10 <sup>9</sup> | [1]       |
|            | Children   | 1.4×10 <sup>9</sup> |           |
| <i>SA</i>  | Adults     | 6032                | [1]       |
|            | Children   | 2373                |           |
| <i>AF</i>  | Adults     | 0.07                | [1]       |
|            | Children   | 0.2                 |           |
| <i>IRF</i> | Adults     | 652000              | [3]       |
|            | Children   | 217000              |           |

<sup>a</sup> The mean for male and female adults; <sup>b</sup> The mean for different ages of children.



**Table S3.** Parameters associated with different pollutants in the exposure risk assessment.

| <b>Compound</b> | <b>ABS<sub>a</sub></b> | <b>CFS<sub>a</sub></b> | <b>RfD<sub>i</sub></b>   | <b>EP<sub>i</sub></b>    |
|-----------------|------------------------|------------------------|--------------------------|--------------------------|
| BBP             | 0.1                    | $1.9 \times 10^{-3}$   | $2.0 \times 10^{-1}$ [4] | $2.0 \times 10^{-4}$ [5] |
| DEP             | 0.1                    | -                      | $8.0 \times 10^{-1}$ [6] | $5.0 \times 10^{-7}$ [5] |
| DEHP            | 0.1                    | $1.4 \times 10^{-2}$   | $2.0 \times 10^{-2}$ [4] | $3.0 \times 10^{-7}$ [5] |
| DnBP            | 0.1                    | -                      | $1.0 \times 10^{-1}$ [6] | $4.1 \times 10^{-5}$ [5] |
| DnOP            | 0.1                    | -                      | $4.0 \times 10^{-2}$ [6] | -                        |
| DMP             | 0.1                    | -                      | $1.0 \times 10^1$ [6]    | -                        |

<sup>a</sup> The parameters are recommend by the USEPA (2015)[1].

**Table S4.** Control and treatment standards of PAEs in soil recommended by the Environmental Protection Agency in United States (mg/kg).

| <b>PAEs</b> | <b>control standards</b> | <b>treatment standards</b> |
|-------------|--------------------------|----------------------------|
| DMP         | 0.020                    | 2.0                        |
| DEP         | 0.071                    | 7.1                        |
| DBP         | 0.081                    | 8.1                        |
| DEHP        | 4.350                    | 50                         |
| BBP         | 1.125                    | 50                         |
| DNOP        | 1.200                    | 50                         |

**Table S5.** Soil TOC and pH concentrations in coastal South China.

| Soil Properties | Mean               | Median            | Min               | Max                |
|-----------------|--------------------|-------------------|-------------------|--------------------|
| TOC             | 10.47 <sup>a</sup> | 9.14 <sup>a</sup> | 0.41 <sup>a</sup> | 36.01 <sup>a</sup> |
| pH              | 6.59               | 6.34              | 5.13              | 8.85               |

<sup>a</sup> The unit of TOC is g kg<sup>-1</sup>.

**Table S6.** Risk assessment of exposure to adults from PAEs levels in soil-plant systems

in coastal areas of South China.

| <b>Congenger</b> | <b>HQ<sub>plant</sub></b>        | <b>HQ<sub>ingest</sub></b>        | <b>HQ<sub>inhale</sub></b>        | <b>HQ<sub>dermal</sub></b>        |
|------------------|----------------------------------|-----------------------------------|-----------------------------------|-----------------------------------|
| DMP              | $(2.92 \pm 2.00) \times 10^{-4}$ | $(6.43 \pm 7.14) \times 10^{-9}$  | $(6.08 \pm 6.76) \times 10^{-19}$ | $(2.71 \pm 3.01) \times 10^{-9}$  |
| DEP              | $(2.85 \pm 2.21) \times 10^{-3}$ | $(9.02 \pm 9.86) \times 10^{-8}$  | $(8.53 \pm 9.62) \times 10^{-18}$ | $(3.81 \pm 4.16) \times 10^{-8}$  |
| DnBP             | $(1.78 \pm 2.49) \times 10^{-1}$ | $(3.10 \pm 2.24) \times 10^{-6}$  | $(2.93 \pm 2.09) \times 10^{-16}$ | $(13.1 \pm 9.44) \times 10^{-7}$  |
| DnOP             | $(1.10 \pm 2.36) \times 10^{-3}$ | $(1.70 \pm 2.89) \times 10^{-7}$  | $(1.61 \pm 2.76) \times 10^{-17}$ | $(7.18 \pm 12.2) \times 10^{-8}$  |
| BBP              | $(2.76 \pm 7.72) \times 10^{-4}$ | $(8.72 \pm 16.4) \times 10^{-9}$  | $(8.26 \pm 11.9) \times 10^{-19}$ | $(3.68 \pm 6.91) \times 10^{-9}$  |
| DEHP             | $(5.97 \pm 4.14) \times 10^{-1}$ | $(2.11 \pm 1.44) \times 10^{-5}$  | $(1.99 \pm 1.34) \times 10^{-15}$ | $(8.90 \pm 6.09) \times 10^{-6}$  |
|                  | <b>CR<sub>plant</sub></b>        | <b>CR<sub>ingest</sub></b>        | <b>CR<sub>inhale</sub></b>        | <b>CR<sub>dermal</sub></b>        |
| BBP              | $(1.05 \pm 2.97) \times 10^{-7}$ | $(3.32 \pm 6.22) \times 10^{-13}$ | $(3.14 \pm 5.89) \times 10^{-22}$ | $(1.40 \pm 2.63) \times 10^{-12}$ |
| DEHP             | $(1.67 \pm 1.16) \times 10^{-4}$ | $(5.90 \pm 4.04) \times 10^{-9}$  | $(5.58 \pm 3.82) \times 10^{-19}$ | $(2.49 \pm 1.70) \times 10^{-9}$  |

**Table S7.** Risk assessment of exposure to children from PAEs levels in soil-plant systems in coastal areas of South China.

| <b>Congenger</b> | <b>HQ<sub>plant</sub></b>        | <b>HQ<sub>ingest</sub></b>        | <b>HQ<sub>inhale</sub></b>        | <b>HQ<sub>dermal</sub></b>        |
|------------------|----------------------------------|-----------------------------------|-----------------------------------|-----------------------------------|
| DMP              | $(5.19 \pm 3.55) \times 10^{-4}$ | $(6.86 \pm 7.61) \times 10^{-8}$  | $(2.94 \pm 3.26) \times 10^{-18}$ | $(1.63 \pm 1.81) \times 10^{-8}$  |
| DEP              | $(5.06 \pm 3.92) \times 10^{-2}$ | $(9.62 \pm 10.5) \times 10^{-7}$  | $(4.12 \pm 4.51) \times 10^{-17}$ | $(2.28 \pm 2.50) \times 10^{-7}$  |
| DnBP             | $(3.17 \pm 4.41) \times 10^{-1}$ | $(3.31 \pm 2.38) \times 10^{-5}$  | $(1.42 \pm 1.02) \times 10^{-15}$ | $(7.84 \pm 5.66) \times 10^{-6}$  |
| DnOP             | $(1.95 \pm 4.19) \times 10^{-3}$ | $(1.81 \pm 3.08) \times 10^{-6}$  | $(7.77 \pm 13.2) \times 10^{-17}$ | $(4.30 \pm 7.31) \times 10^{-7}$  |
| BBP              | $(1.13 \pm 3.16) \times 10^{-4}$ | $(2.15 \pm 4.03) \times 10^{-9}$  | $(9.20 \pm 1.73) \times 10^{-19}$ | $(5.10 \pm 9.59) \times 10^{-9}$  |
| DEHP             | $(2.45 \pm 1.69) \times 10^{-1}$ | $(5.19 \pm 3.55) \times 10^{-5}$  | $(2.22 \pm 1.52) \times 10^{-15}$ | $(12.3 \pm 8.42) \times 10^{-6}$  |
|                  | <b>CR<sub>plant</sub></b>        | <b>CR<sub>ingest</sub></b>        | <b>CR<sub>inhale</sub></b>        | <b>CR<sub>dermal</sub></b>        |
| BBP              | $(4.30 \pm 12.0) \times 10^{-8}$ | $(8.16 \pm 15.3) \times 10^{-12}$ | $(3.50 \pm 6.56) \times 10^{-22}$ | $(1.94 \pm 3.63) \times 10^{-12}$ |
| DEHP             | $(6.85 \pm 4.75) \times 10^{-5}$ | $(14.5 \pm 9.94) \times 10^{-9}$  | $(6.22 \pm 4.26) \times 10^{-19}$ | $(3.45 \pm 2.36) \times 10^{-9}$  |

**Table S8.** Potential estrogenic effect of PAEs via plant.

| PAE compounds | Plant              |                             |
|---------------|--------------------|-----------------------------|
|               | Mean value (mg/kg) | EEQ (ng E <sub>2</sub> /kg) |
| DEP           | 0.29 ± 0.23        | 0.15 ± 0.11                 |
| DnBP          | 2.28 ± 3.18        | 93.56 ± 130.40              |
| BBP           | 0.02 ± 0.05        | 3.80 ± 10.64                |
| DEHP          | 4.11 ± 2.85        | 1.23 ± 0.86                 |
| Total         | 6.70 ± 5.19        | 98.75 ± 130.64 <sup>a</sup> |

<sup>a</sup> The sum EEQ levels of DEP, DnBP, BBP, DEHP.



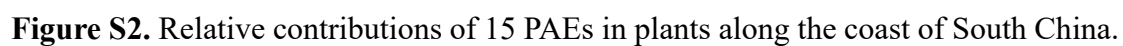



## References

1. USEPA. *Mid-Atlantic RISK Assessment*. ; United States Environmental Protection Agency: Washington, DC, USA, 2015.
2. USEPA. *Exposure factors handbook, EPA/600/P-95/002F; Environmental Protection Agency; Office of Research and Development: Washington, DC, 1997.*
3. China, N.B.o.S.o. *China Statistical Yearbook*; China Statistic Press, Beijing., 2015.
4. Zeng, H.-H.; Zhang, H.-X.; Wu, X.; Gu, H.-X.; Zhang, L.-Z.; Liu, Y.-Y.; Zhao, X.-F.; Li, J.-H. Pollution levels and health risk assessment of particulate phthalic acid esters in arid urban areas. *Atmospheric. Pollut. Res.* **2017**, *8(1)*, 188–195.
5. Zeng, L.-J.; Huang, Y.-H.; Chen, X.-T.; Chen, X.-H.; Mo, C.-H.; Feng, Y.-X.; Lü, H.; Xiang, L.; Li, Y.-W.; Li, H.; Cai, Q.-Y.; Wong, M.-H. Prevalent phthalates in air-soil-vegetable systems of plastic greenhouses in a subtropical city and health risk assessments. *Sci. Total. Environ.* **2020**, *743*, 1–11.
6. Wang, L.; Liu, M.; Tao, W.; Zhang, W.; Wang, L.; Shi, X.; Lu, X.; Li, X. Pollution characteristics and health risk assessment of phthalate esters in urban soil in the typical semi-arid city of Xi'an, Northwest China. *Chemosphere.* **2018**, *191*, 467–476.
